# Supplementary material
Source: PubMed Central journal article supplement (PMC6811842)
Supplement: ao9b01051_si_001.pdf [file ao9b01051_si_001.pdf]

## Supporting information

### **Covalently fluorophore functionalized ZIF-8 colloidal particles as a sensing platform for endocrine disrupting chemicals such as phthalates plasticizers**

Ander Chapartegui-Arias<sup>a,b</sup>, Jose A. Villajos<sup>a</sup>, Anett Myxa<sup>a</sup>, Sebastian Beyer<sup>a,c</sup>, Jana Falkenhagen<sup>a</sup>, Rudolf J. Schneider<sup>a,d</sup>, Franziska Emmerling<sup>\*a</sup>.

<sup>a</sup>Federal Institute for Materials Research and Testing (BAM), Richard-Willstätter- Str. 11, D – 12489 Berlin, Germany.

<sup>b</sup>Department of Chemistry, Humboldt-Universität zu Berlin, Brook-Taylor-Str. 2, D – 12489 Berlin, Germany.

<sup>c</sup>Chinese University of Hong Kong, Institute for Tissue Engineering and Regenerative Medicine, Shatin, Hong Kong

<sup>d</sup>Technische Universität Berlin, Straße des 17. Juni 135, D – 10623 Berlin, Germany..

Correspondence should be addressed to:

Dr. Franziska Emmerling  
BAM Federal Institute for Materials Research and Testing  
Richard-Willstätter- Str. 11, D – 12489 Berlin, Germany  
Email: [franzisca.emmerling@bam.de](mailto:franzisca.emmerling@bam.de)  
Tel: +493081041133

On the following document we provide the necessary information to complement the discussion provided on the associated paper. It is divided in five parts: i) Structural characterization of the modified ZIFs via powder x-ray diffraction; ii) Particle size distribution characterization via electron microscopy; iii) Composition determination of the modified ZIFs via HPLC (after digestion); iiiii) photophysical characterization of the modified ZIFs; v) Pore size distribution studies for the obtained ZIFs.

i) Structural Characterization of the modified ZIFs via x-ray diffraction

Powder x-ray diffractograms

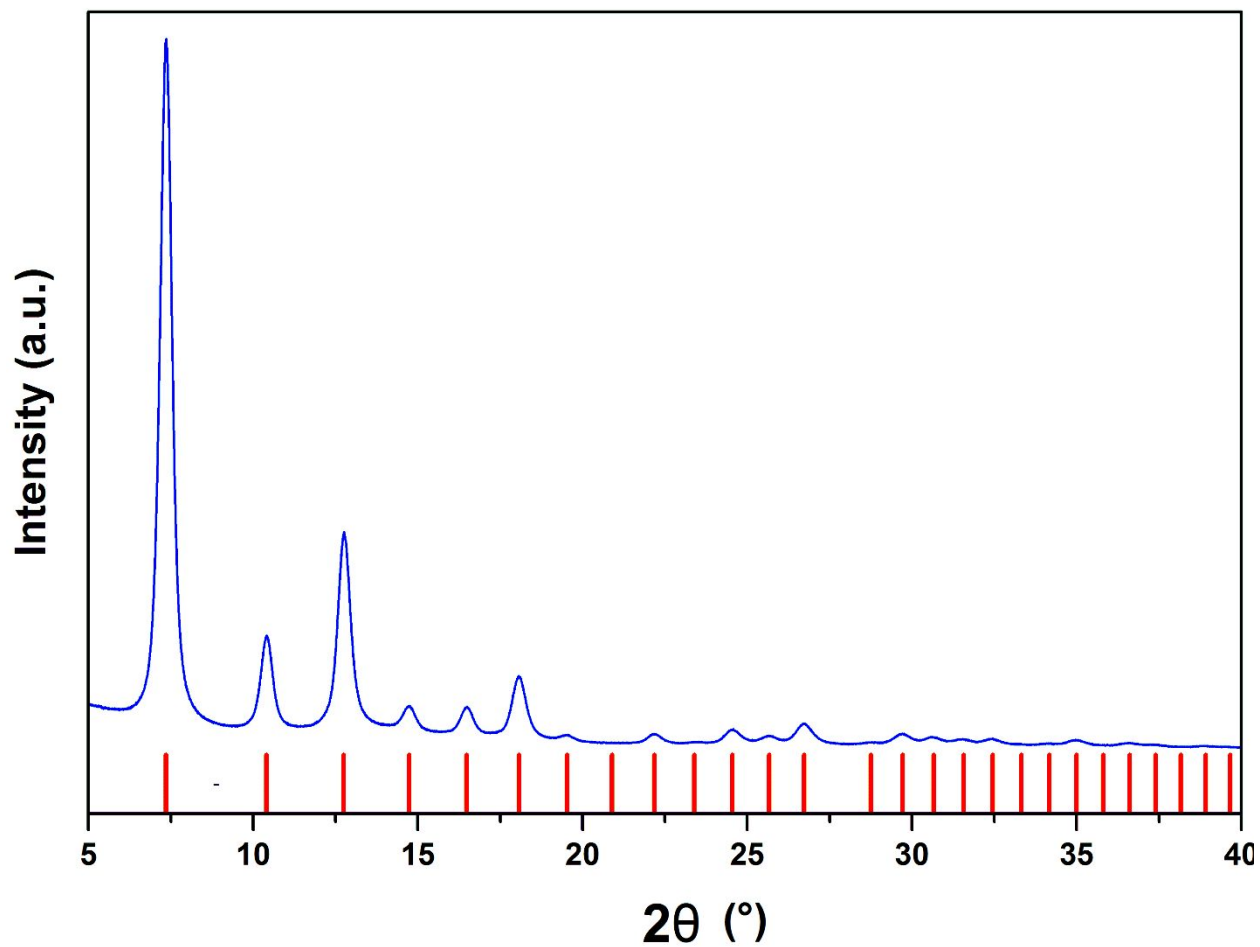

Figure S1\_a. Powder X-Ray diffractogram for Z8P-0.25

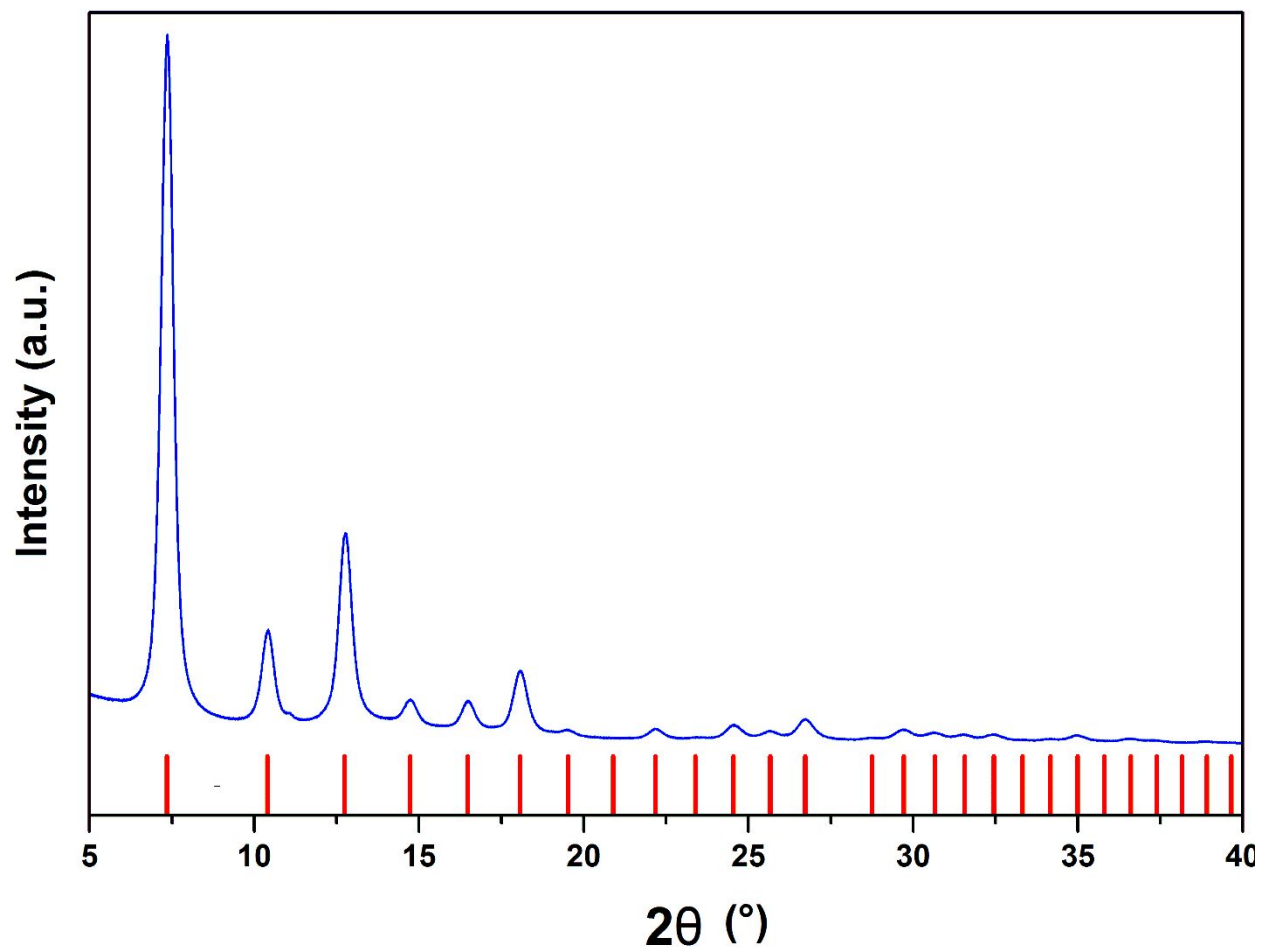

Figure S1\_b. Powder X-Ray diffractogram for Z8P-0.50

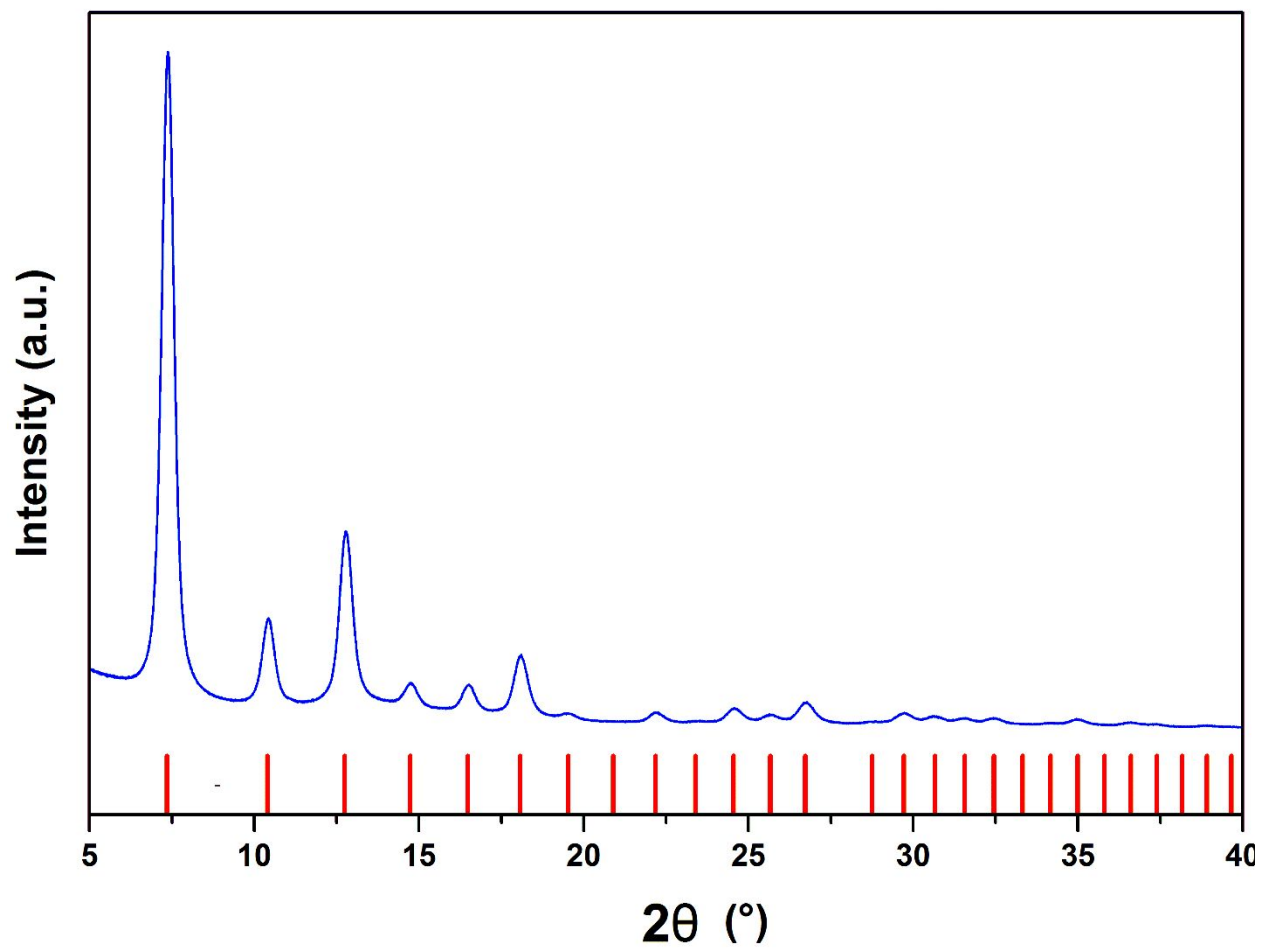

Figure S1\_c. Powder X-Ray diffractogram for Z8P-0.75

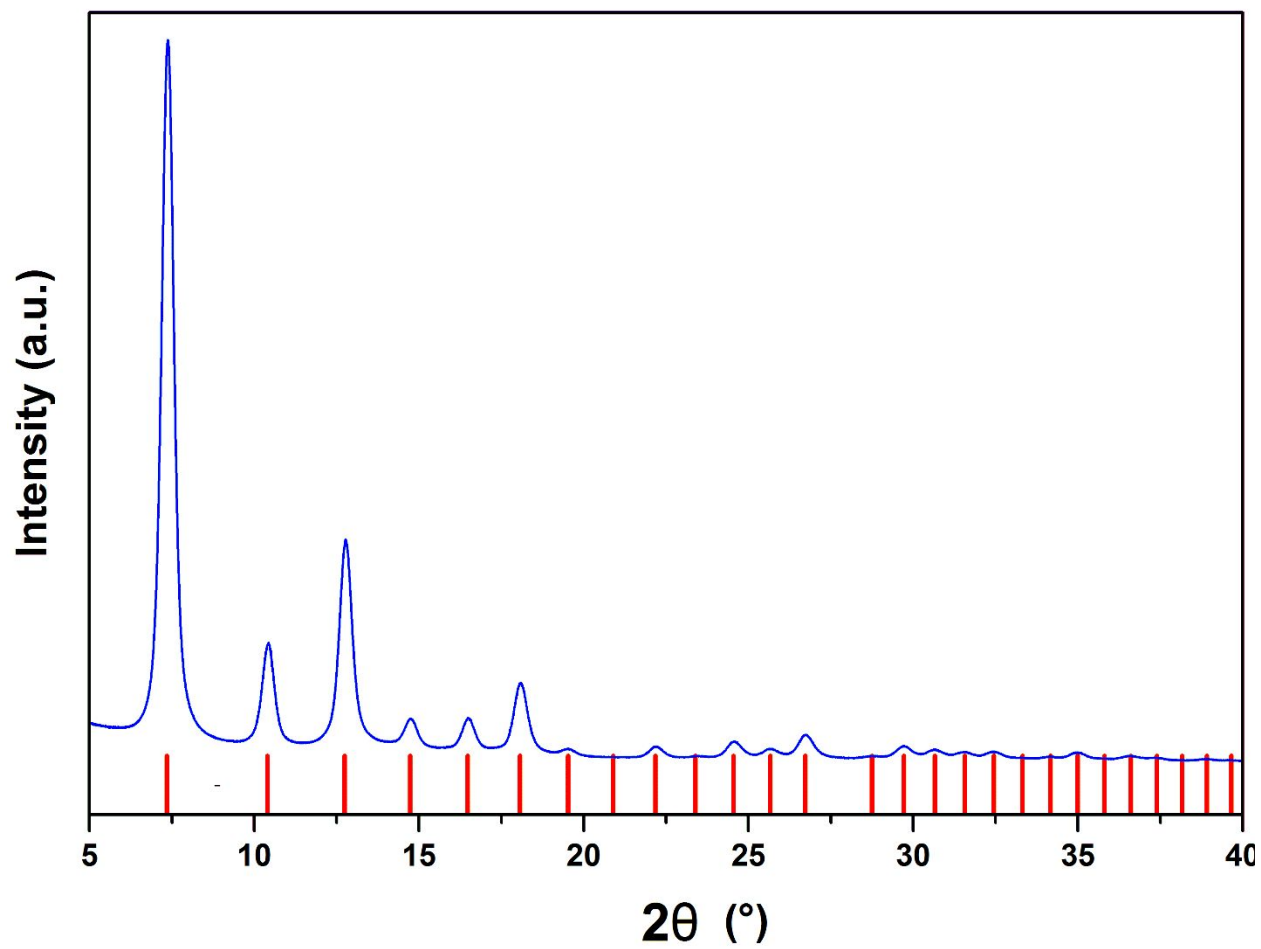

Figure S1\_d. Powder X-Ray diffractogram for Z8P-1.00

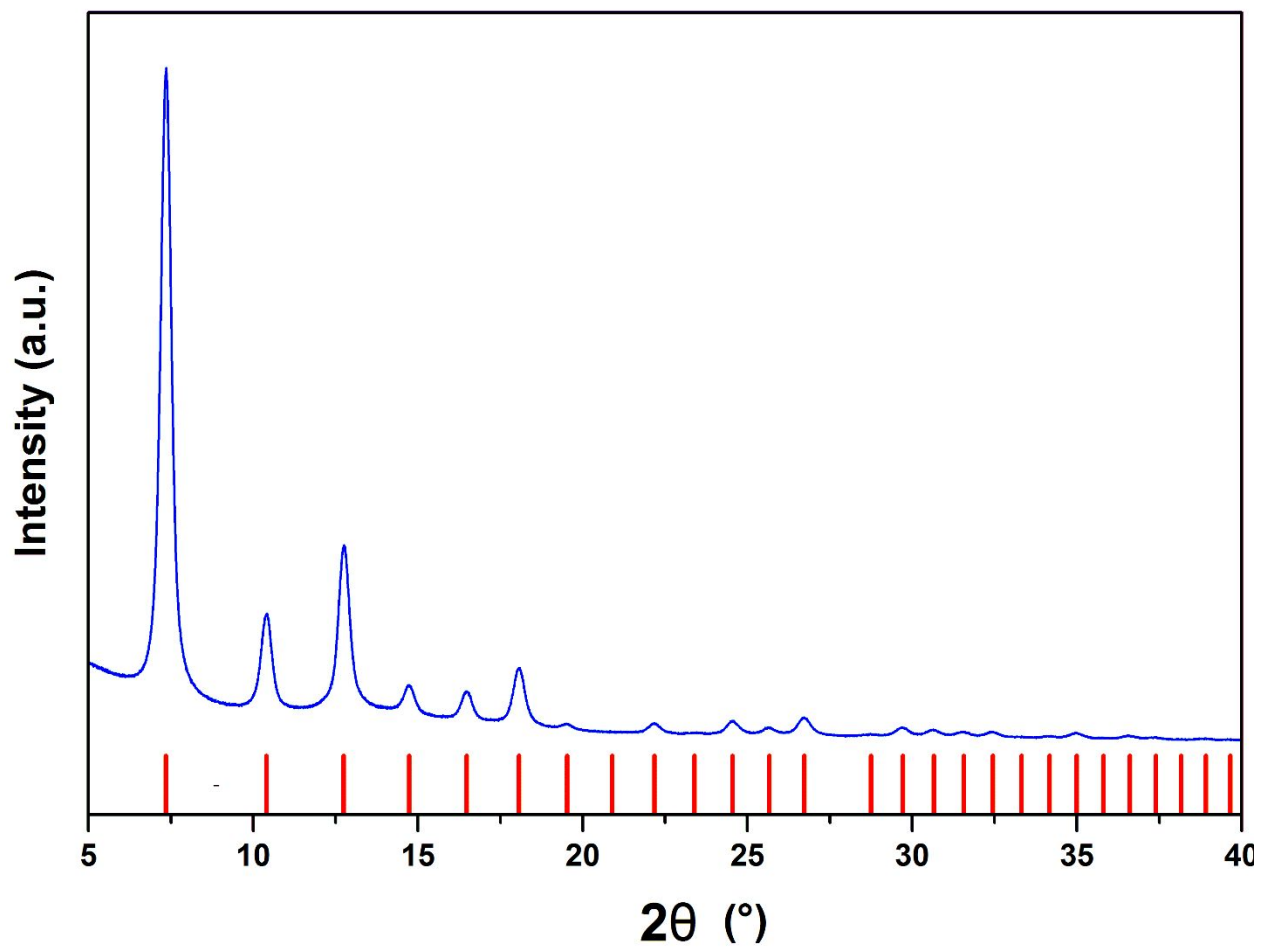

Figure S1\_e. Powder X-Ray diffractogram for Z8P-2.50

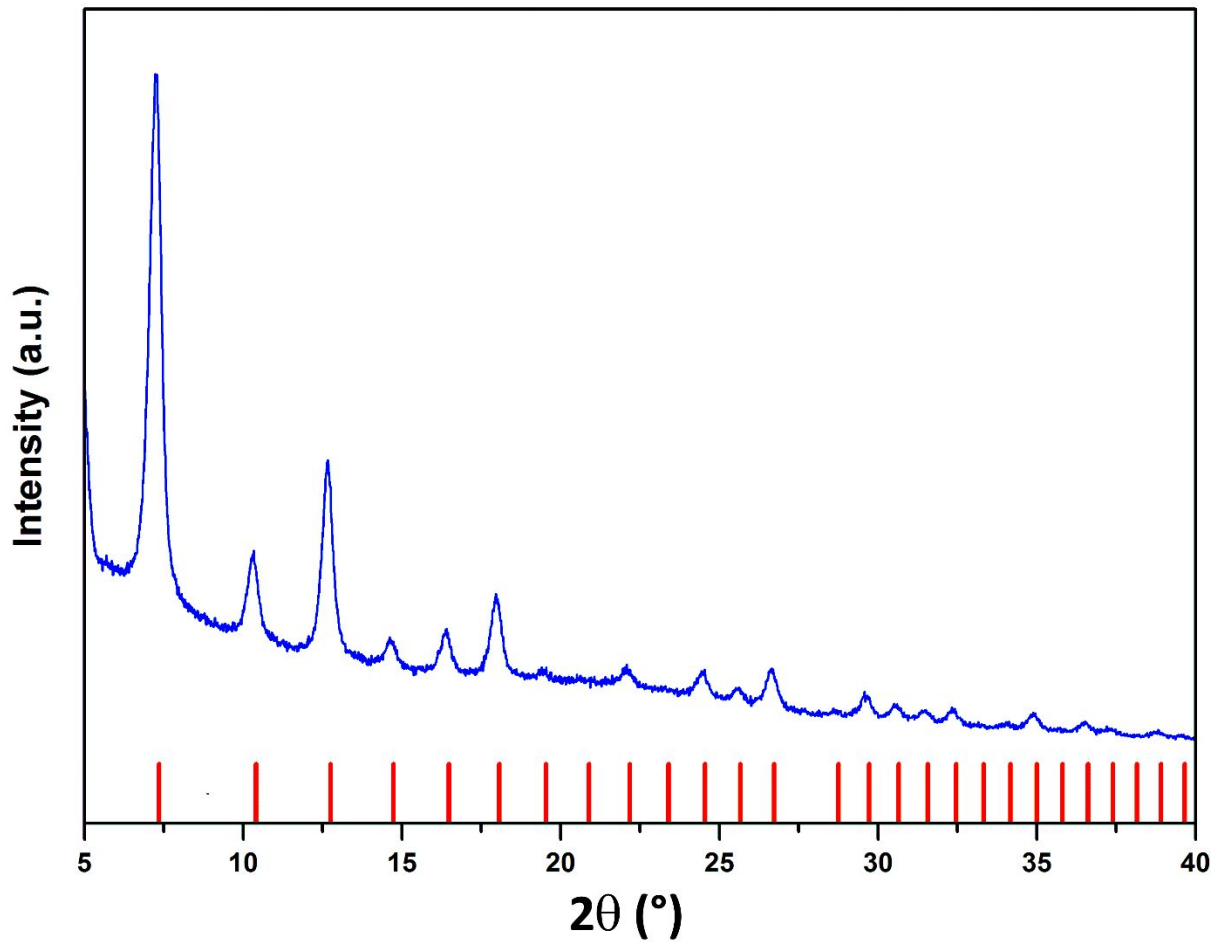

Figure S1\_f. Powder X-Ray diffractogram for the nanoparticulated ZIF-8

ii) Particle size and size distribution characterization of the modified ZIFs via Transmission Electron Microscopy

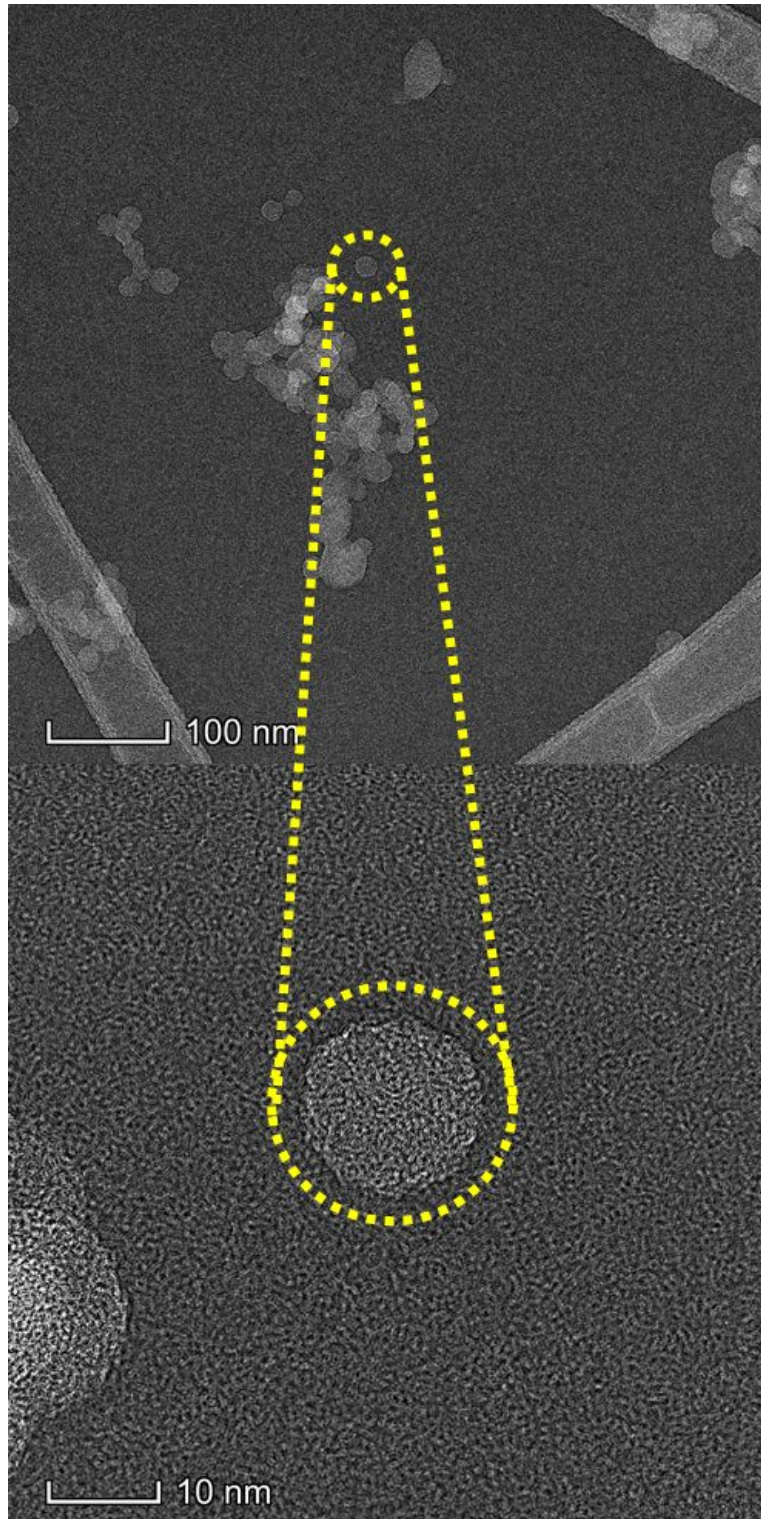



Figure S2\_a. TEM Image for Z8P-5.00 nanoparticles.

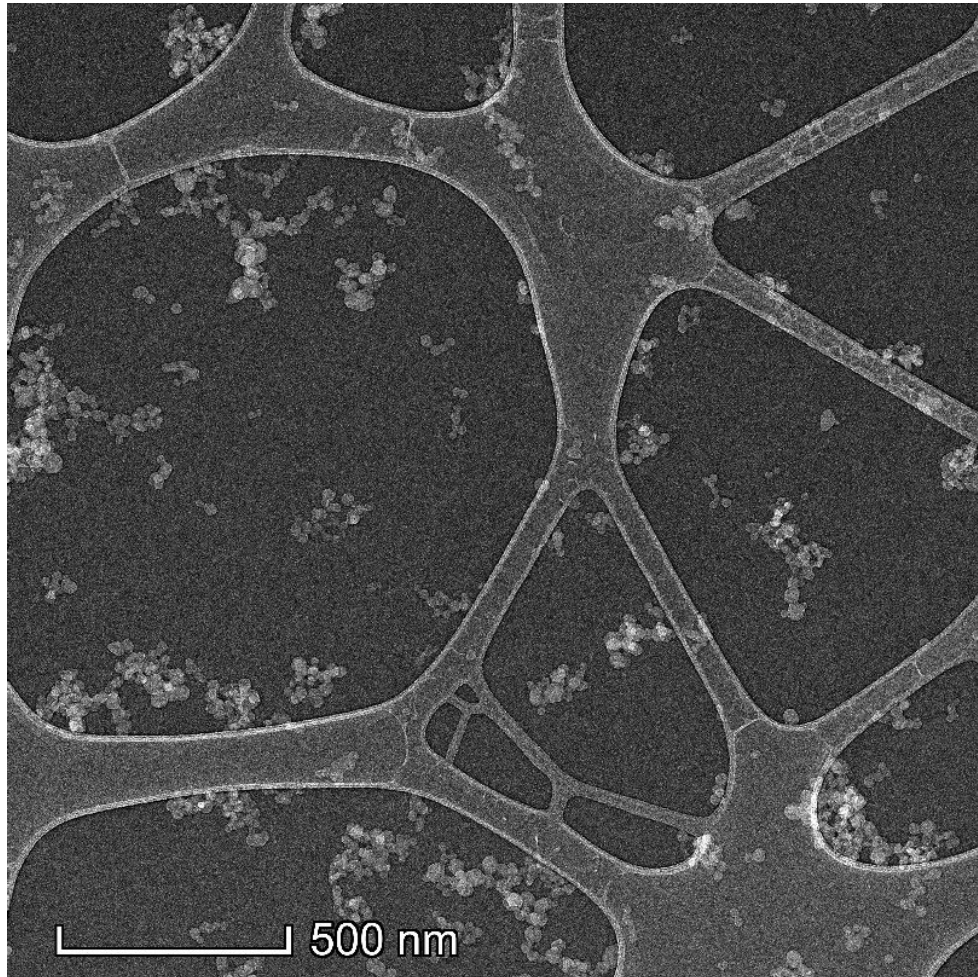

Figure S2\_b. Overview of Z8P-5.00 particles

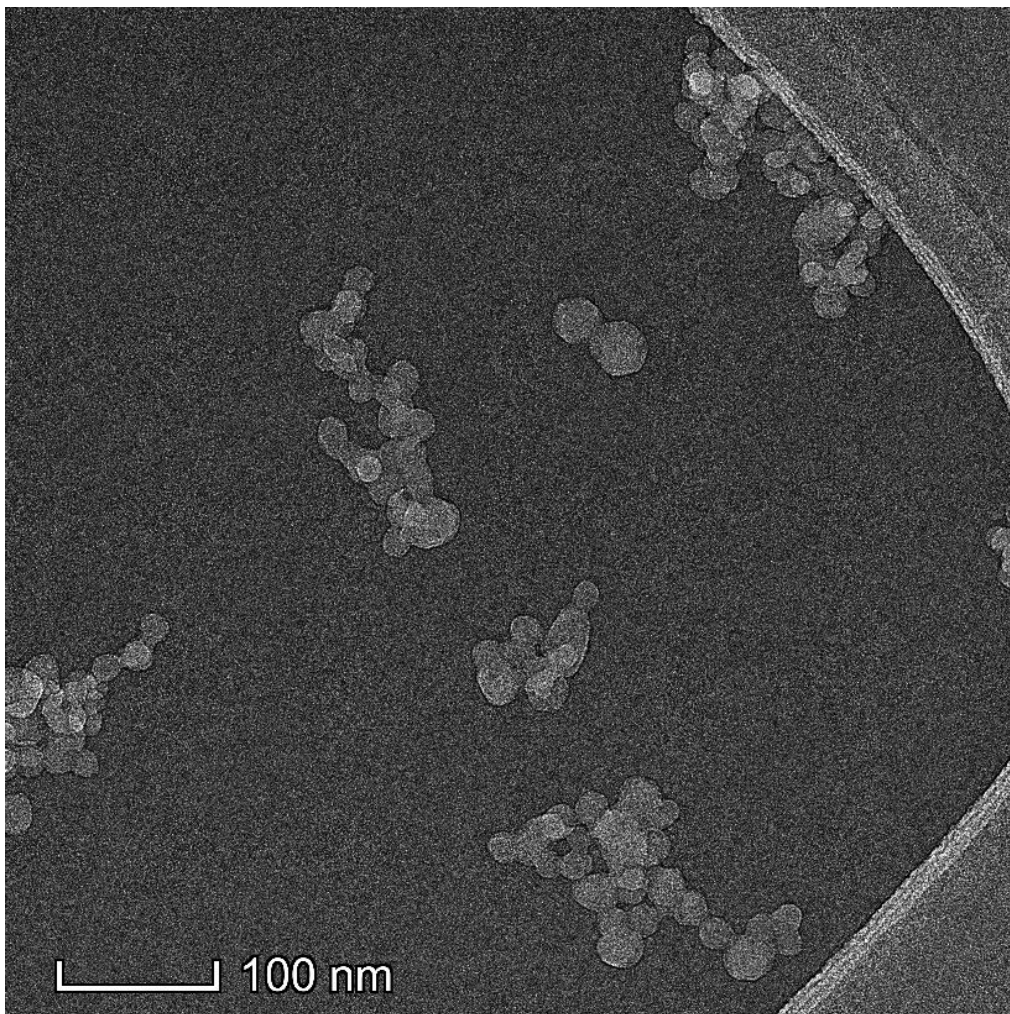

Figure S2\_c. Overview of Z8P-5.00 particles

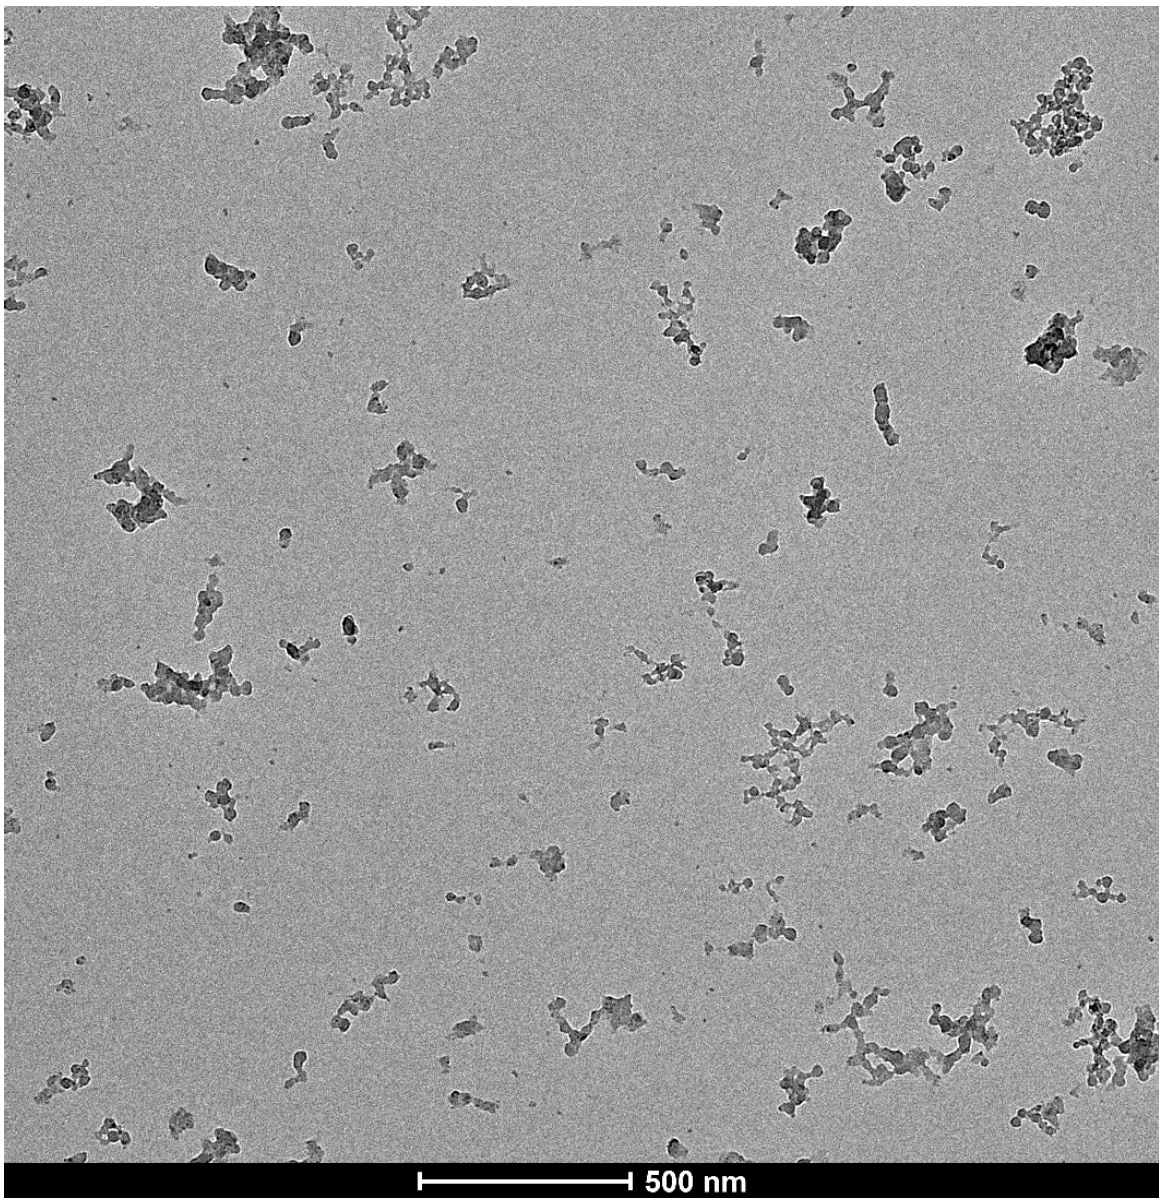

Figure S2\_d. Overview of Z8P-0.50 particles

- iii) Composition determination of the modified ZIFs via HPLC (after digestion)

HPLC Chromatograms

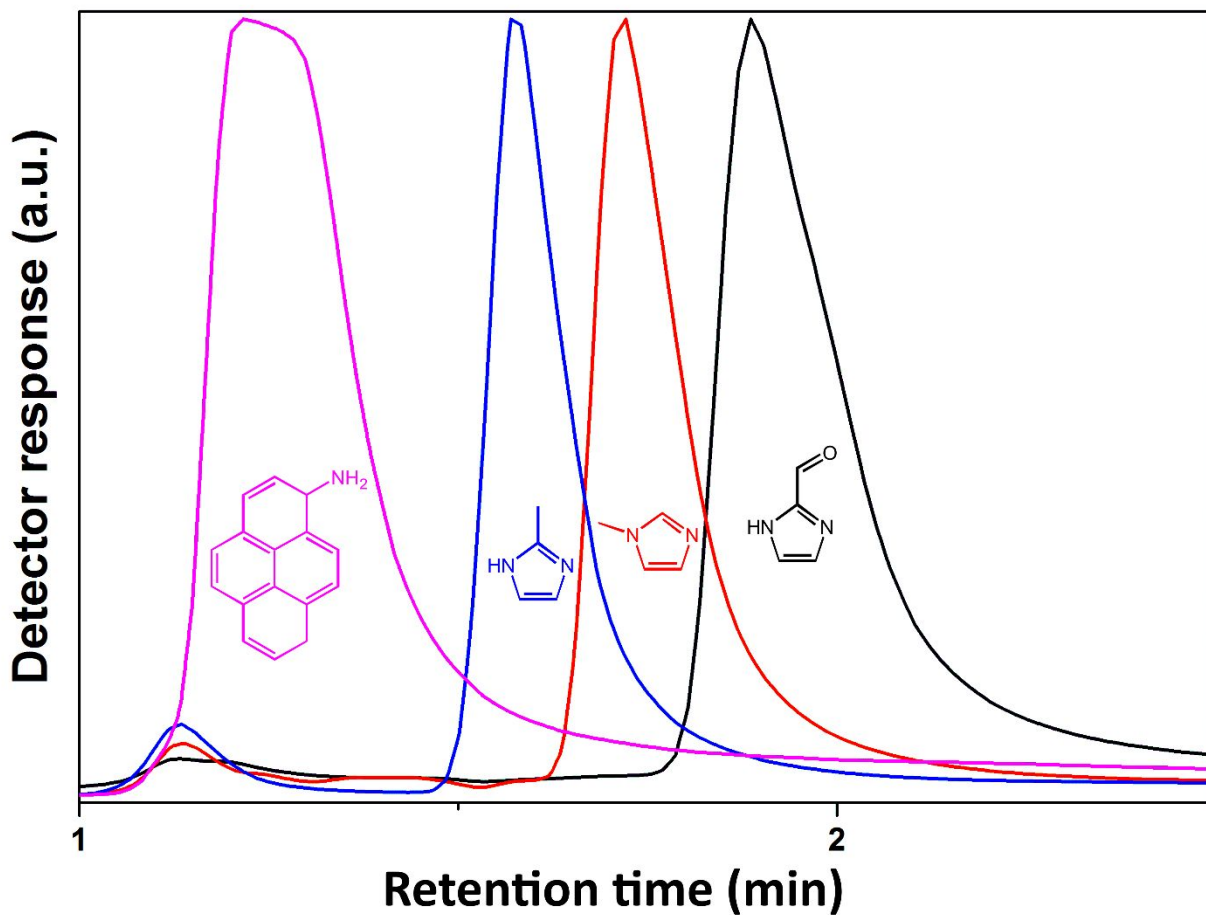

Figure S3\_a. Normalized chromatograms with retention times for each of the chemical species of interest.

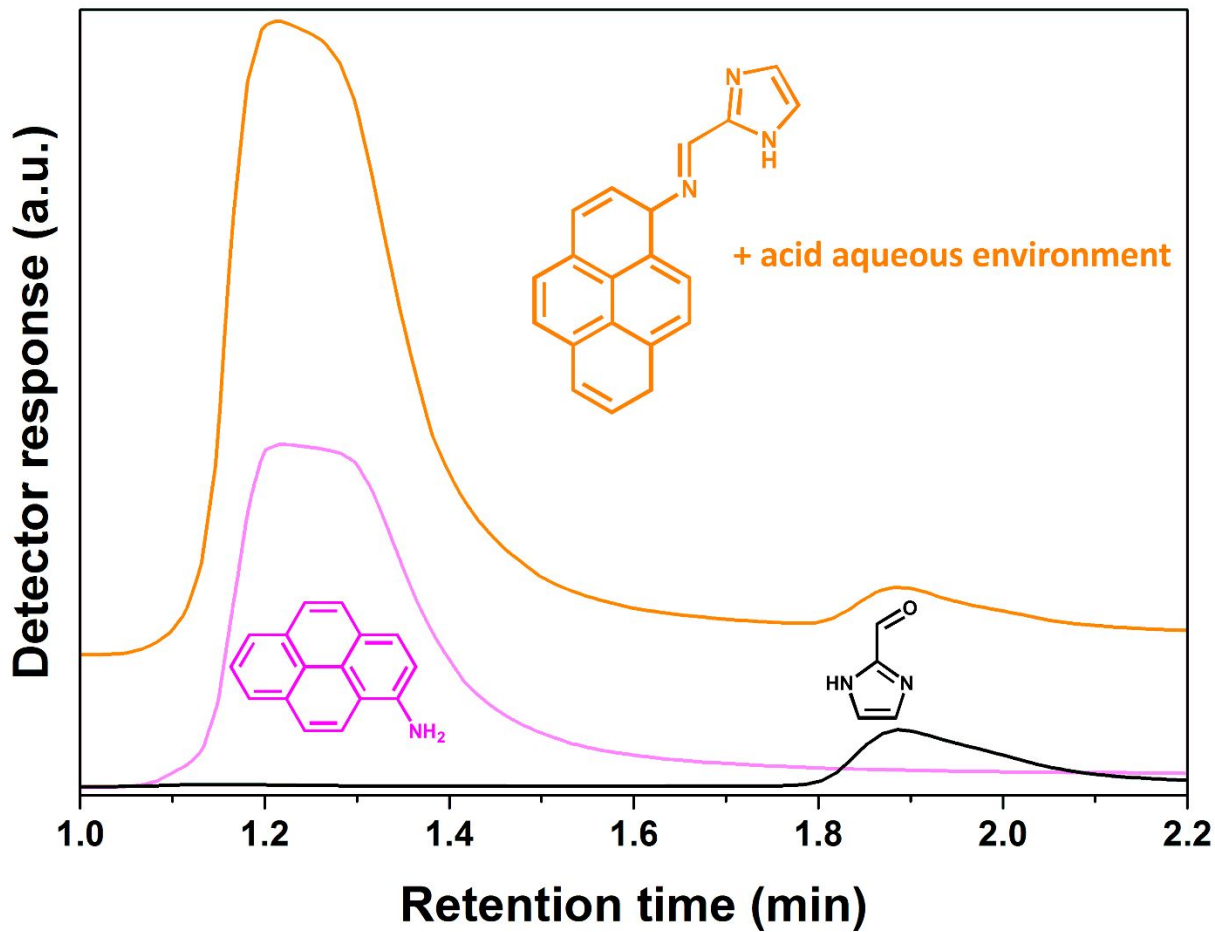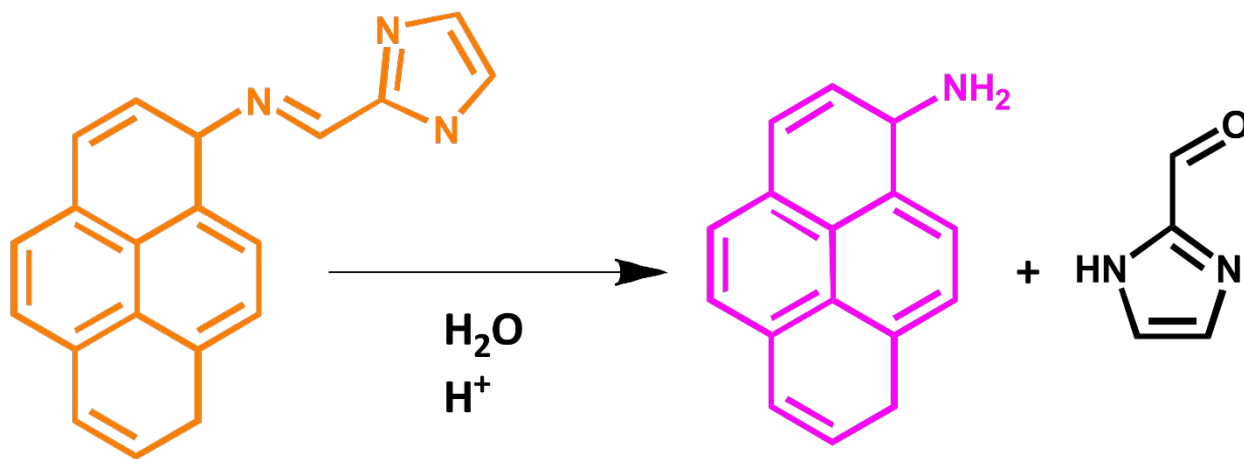

Figure S3\_b. Chromatogram for digested Z8S (orange line) superposed to those of 1-aminopyrene (magenta) and 2-imidazolecarboxaldehyde (black). The acidic conditions of the digestion process for the Z8P MOF causes the fluorophore Z8S linkage to hydrolyze into 2-imidazolecarboxaldehyde and 1-aminopyrene.

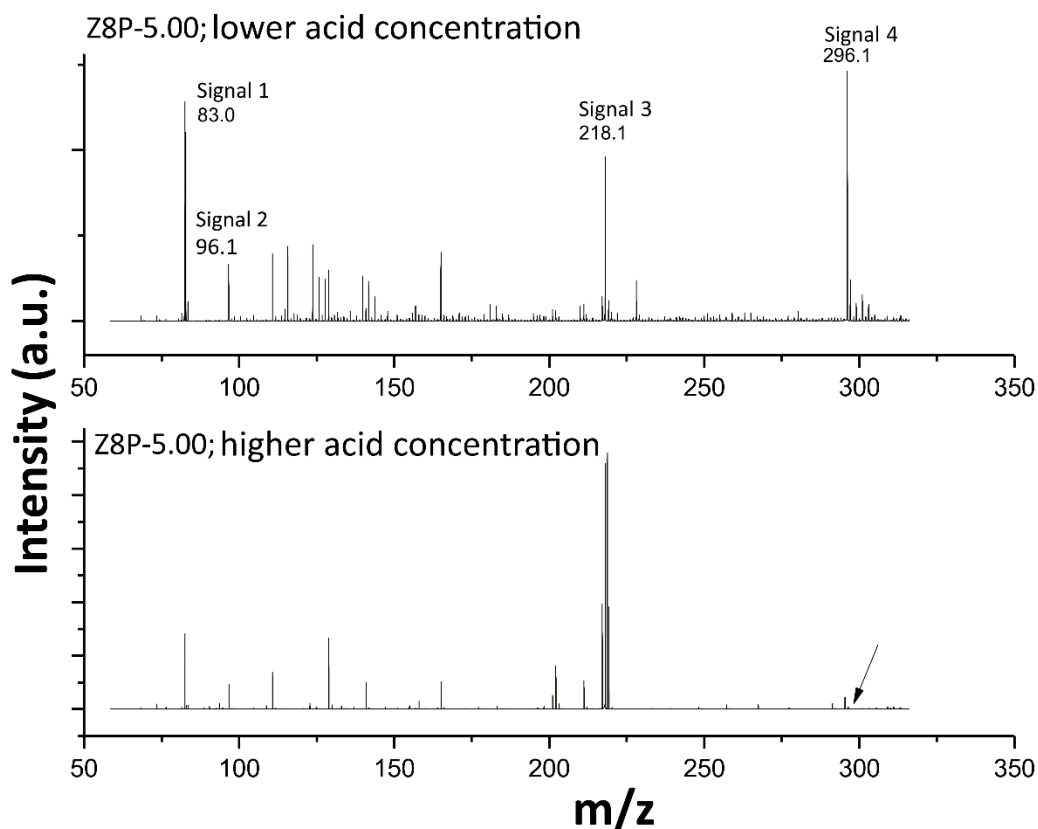

Figure S3\_c. Mass spectra for Z8P-5.00 with different volumes of aqueous 1M HCl (top 20  $\mu$ l [lower acid concentration], pH between 7.0 and 6.3; bottom 50  $\mu$ l [higher acid concentration], pH under 6.0) on a total digestion volume of 3 ml with 100 mg of Z8P-5.00. On low acidic conditions all species for Z8S can be identified (1- and 2-methylimidazole [Signal 1], 83.0; 2-imidazolecarboxaldehyde [Signal 2], 96.1; 1-aminopyrene [Signal 3], 218,1; Z8P-S [Signal 4], 296,1).

At lower pH, Z8S cannot be identified anymore, and the signals for the aminopyrene, imidazolecarboxaldehyde and 2-methylimidazole intensify. Another effect observed when increasing the share of added 1 M HCl is that many fractions that can be observed on the 120 to the 150 m/z range disappear. We believe these are due to the partial coordination spheres of the zinc with the imidazole species.



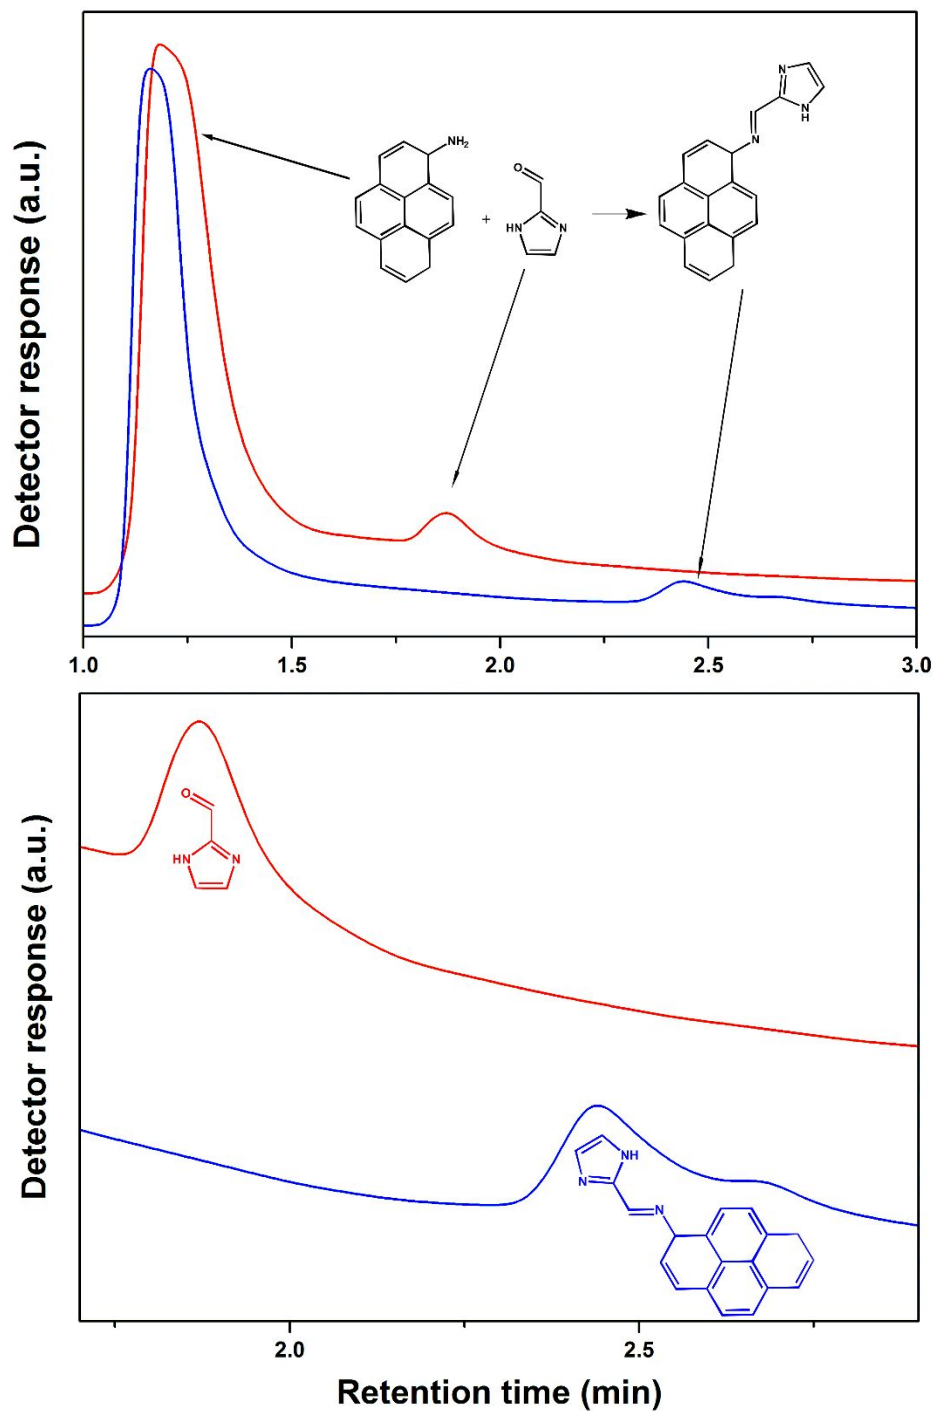

Figure S3\_d. HPLC chromatograms of the reaction between 1-aminopyrene and 2-imidazolecarboxaldehyde. The mix was eluted using the eluent with trifluoroacetic acid (TFA, red line) and without TFA (blue line). The results match with the data obtained via mass spectrometry (Figure S3-c). The intensity for the aminopyrene peak suggests that the reaction has a low yield, although it can be also suspected that the acidity of the solid phase on the column was enough to hydrolyze the sensing element (Z8P-S).

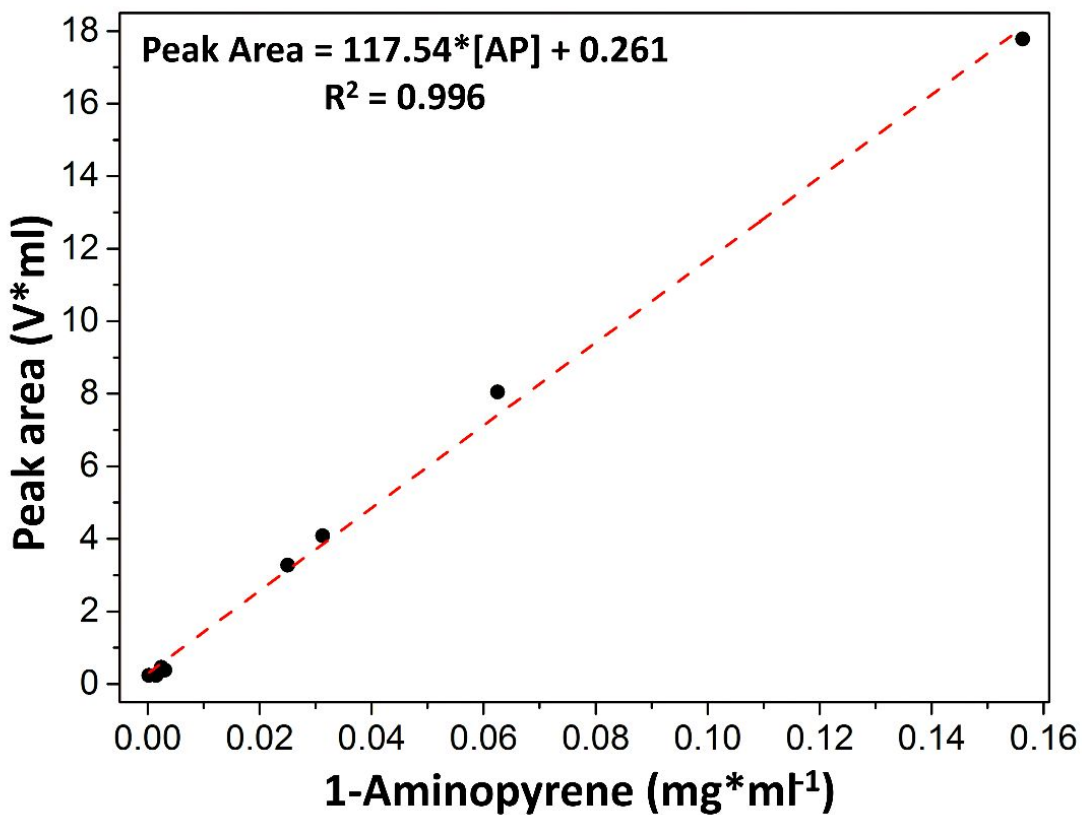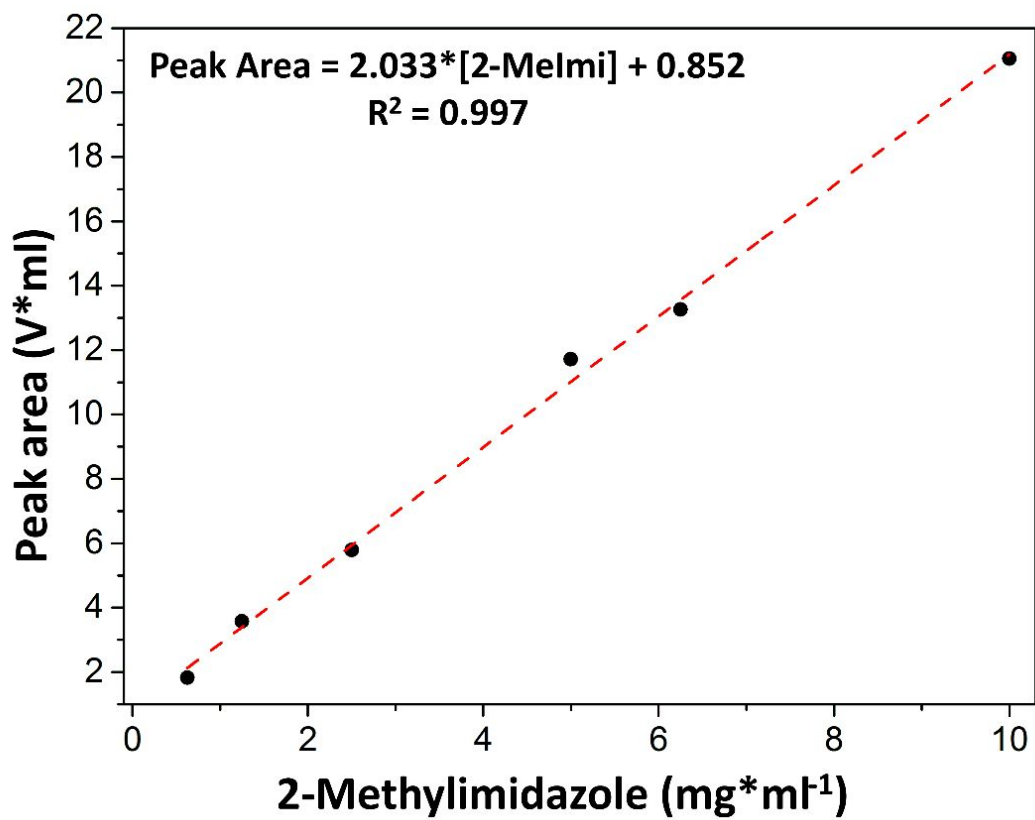



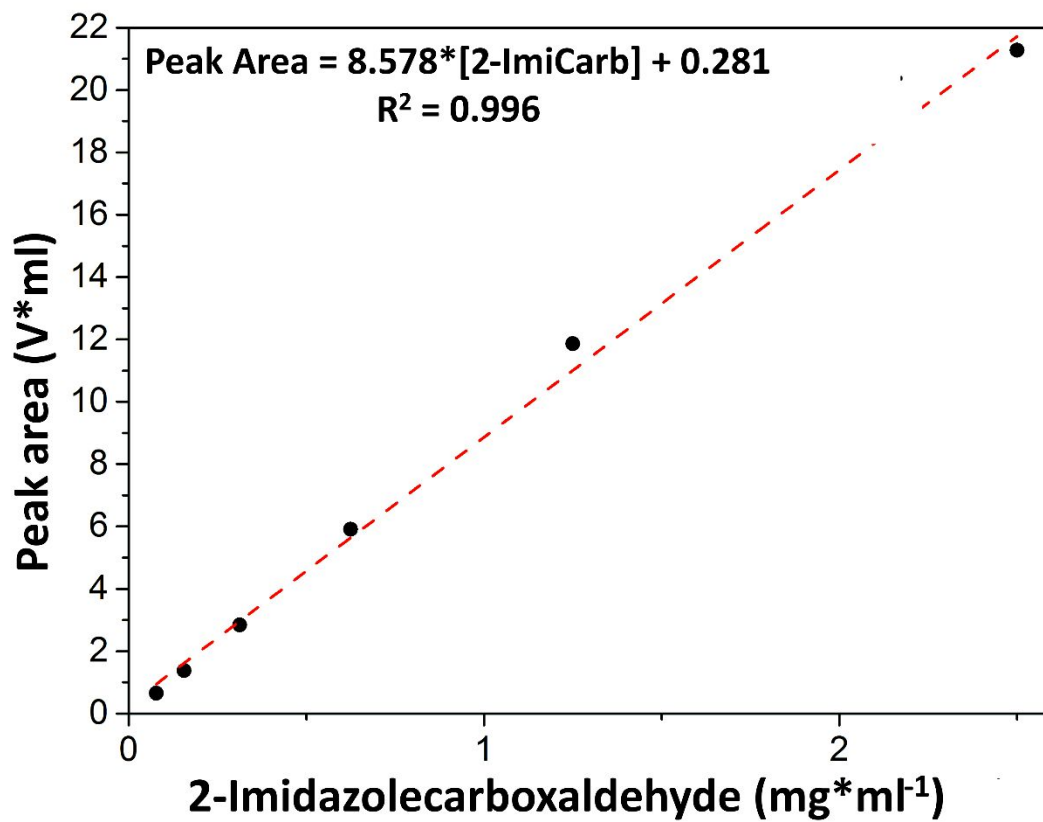

Figure S3\_e. HPLC calibration curves for 1-aminopyrine (top), 2-methylimidazole (middle), and 2-imidazolecarboxaldehyde (bottom).

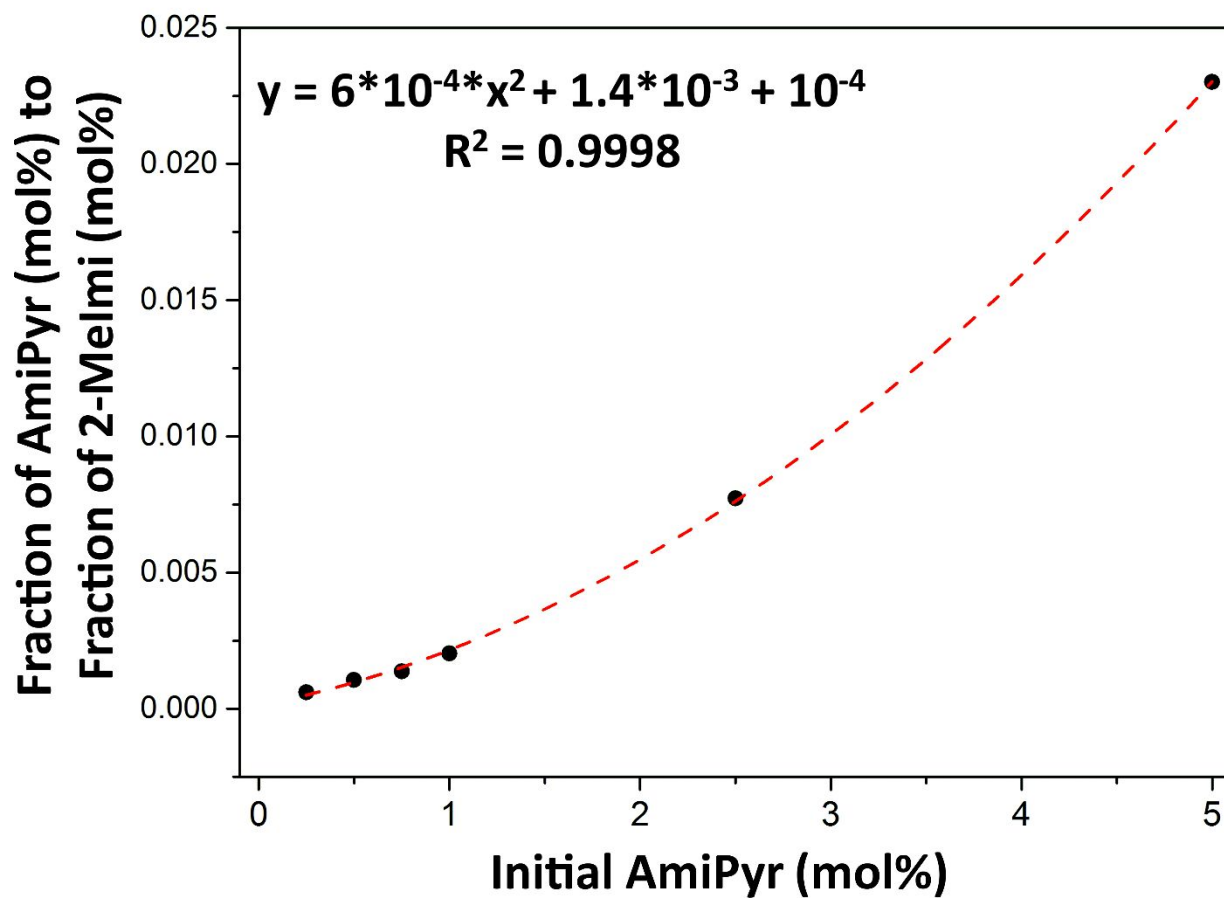

Figure S3\_f. Graphical representation of the covalent immobilization of 1-aminopyrene during the synthetic process. The graphic shows the ratio of 1-aminopyrene (in mol%) to 2-methylimidazole (in mol%) in precipitated Z8P MOFs (from Z8P-0.25 to Z8P-5.00) as function of the original concentration for 1-aminopyrene (in mol%) for each Z8P MOF in the mother liquor during synthesis.

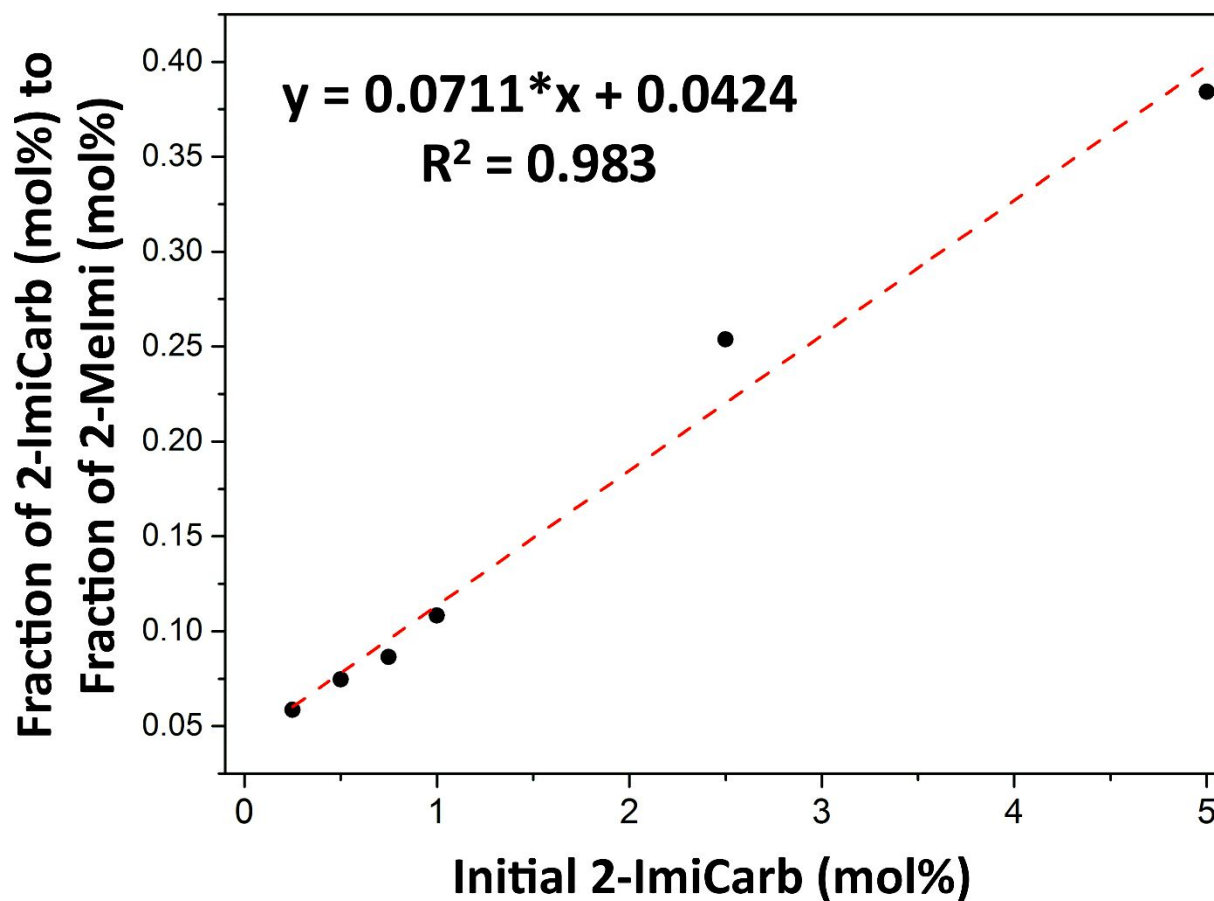

Figure S3\_g. Graphical representation of the inclusion of 2-imidazolecarboxaldehyde during the synthetic process. The graphic shows the ratio of 2-imidazolecarboxaldehyde (in mol%) to 2-methylimidazole (in mol%) in precipitated Z8P MOFs (from Z8P-0.25 to Z8P-5.00) as function of the original concentration for 2-imidazolecarboxaldehyde (in mol%) for each Z8P MOF in the mother liquor during synthesis.

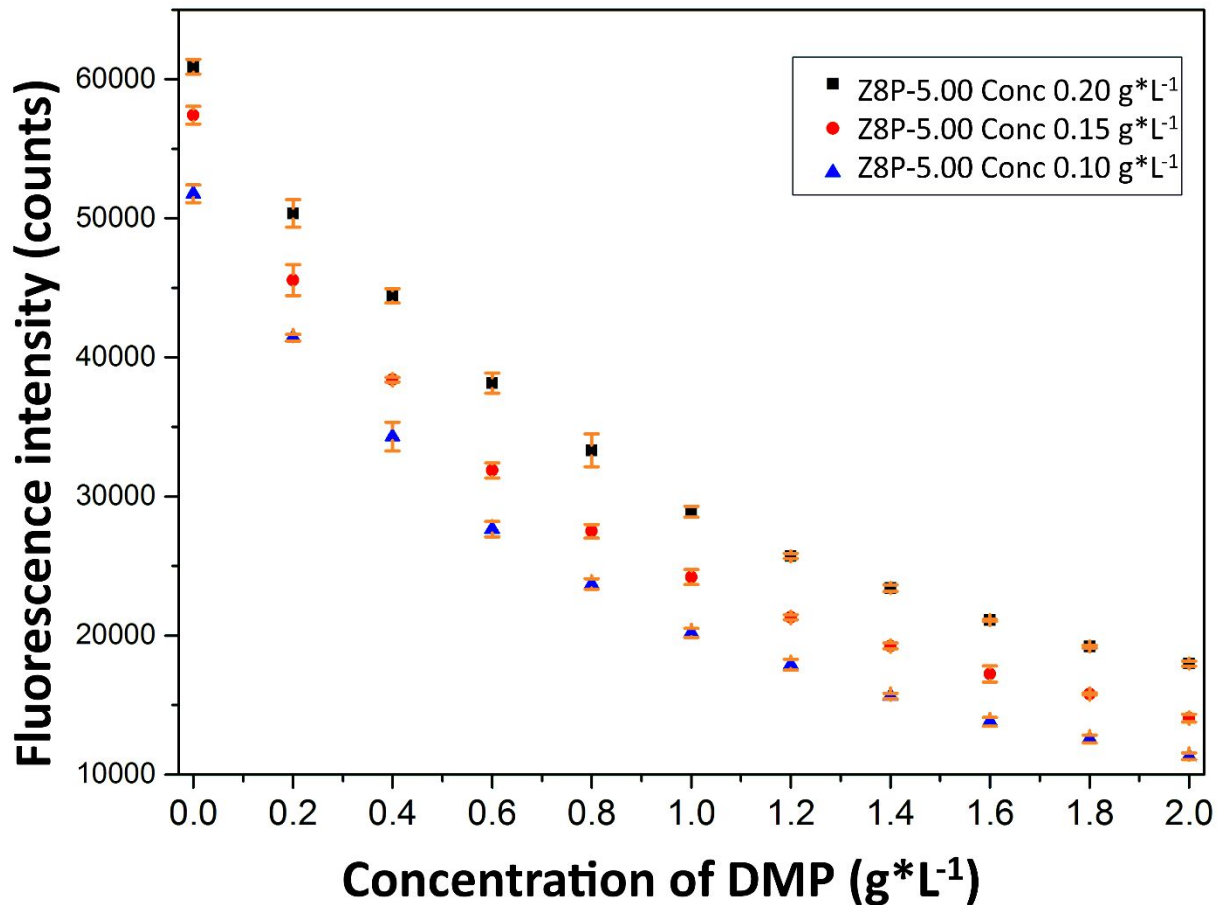

Figure S4\_a. Representation of the fluorescence intensity maximum (430 nm) versus the concentration for DMP for three different concentrations for Z8P-5.00 suspended on methanol. The effect of the quenching is independent of the concentration for the sensing element within the investigated range.

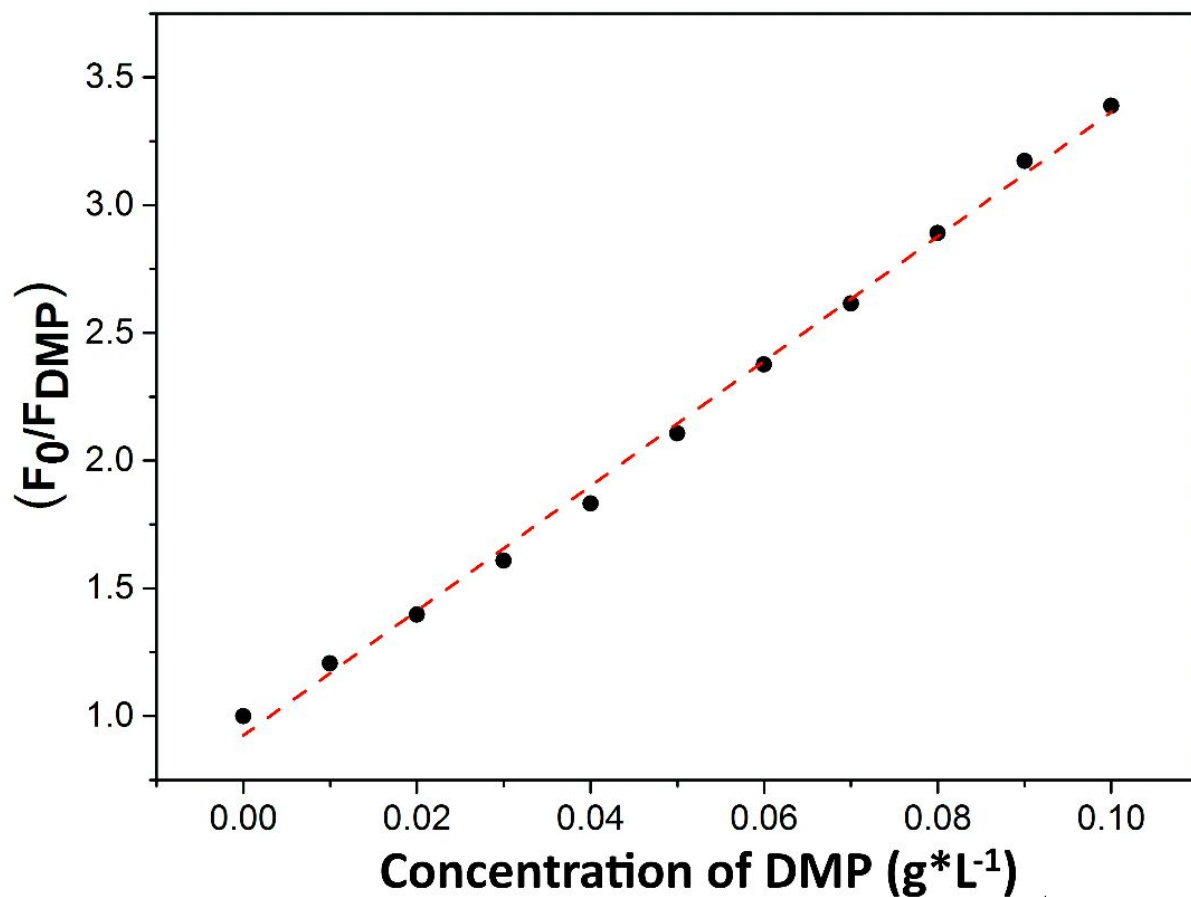

Figure S4\_b: Stern-Volmer fitting for the obtained fluorescence data for Z8P-5.00 at the concentration of 0.20 (g\*L<sup>-1</sup>) versus changing concentration for DMP. When a linear model was applied the fitting did not suit the obtained data.

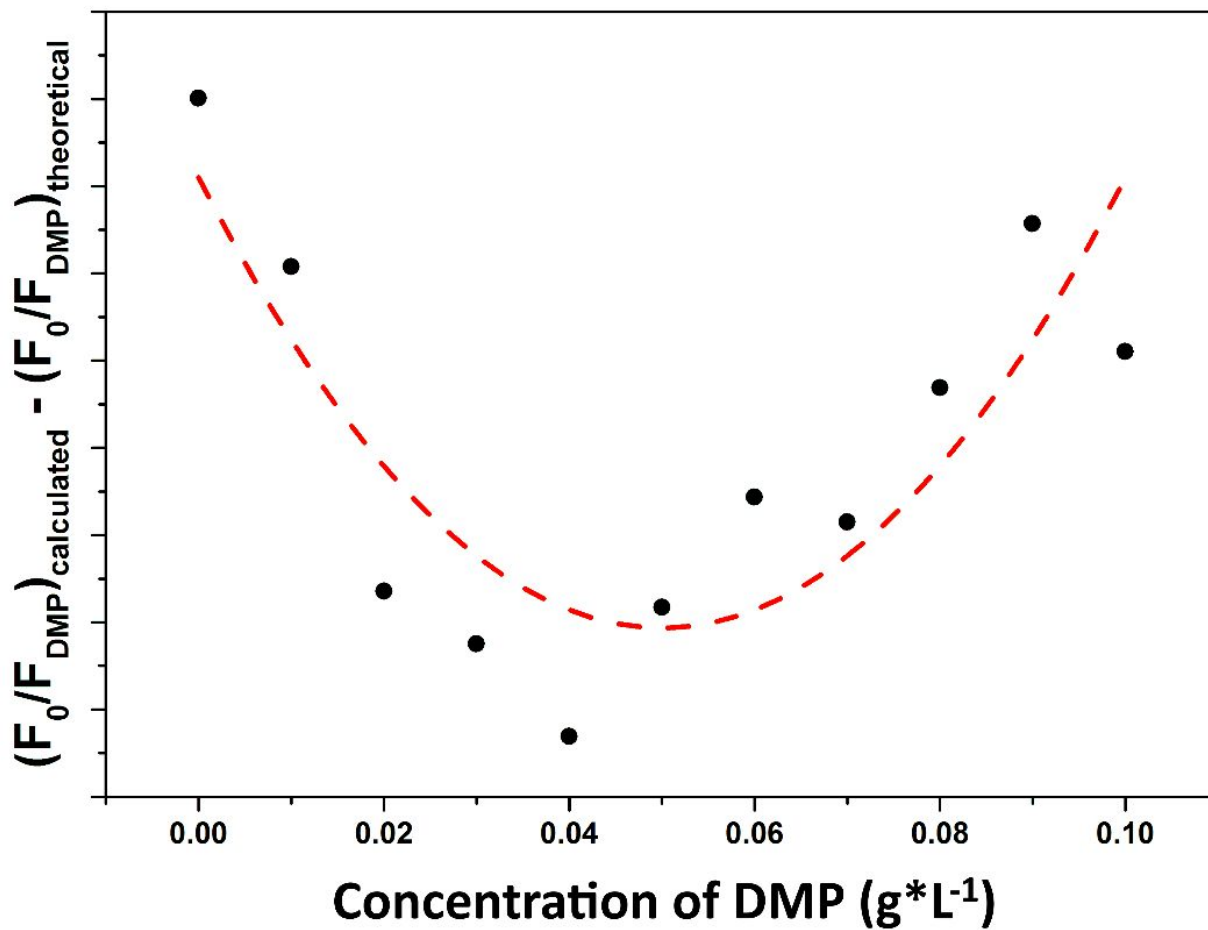

Figure S4\_c: Residue curve obtained from subtracting the theoretical fluorescence intensity value from the linear fitting from the real fluorescence intensity values for each DMP concentration. A clear tendency that proves the non-adequacy of the mathematical model applied to the system can be observed. A quadratic mathematical model was then applied to the data that fitted well.

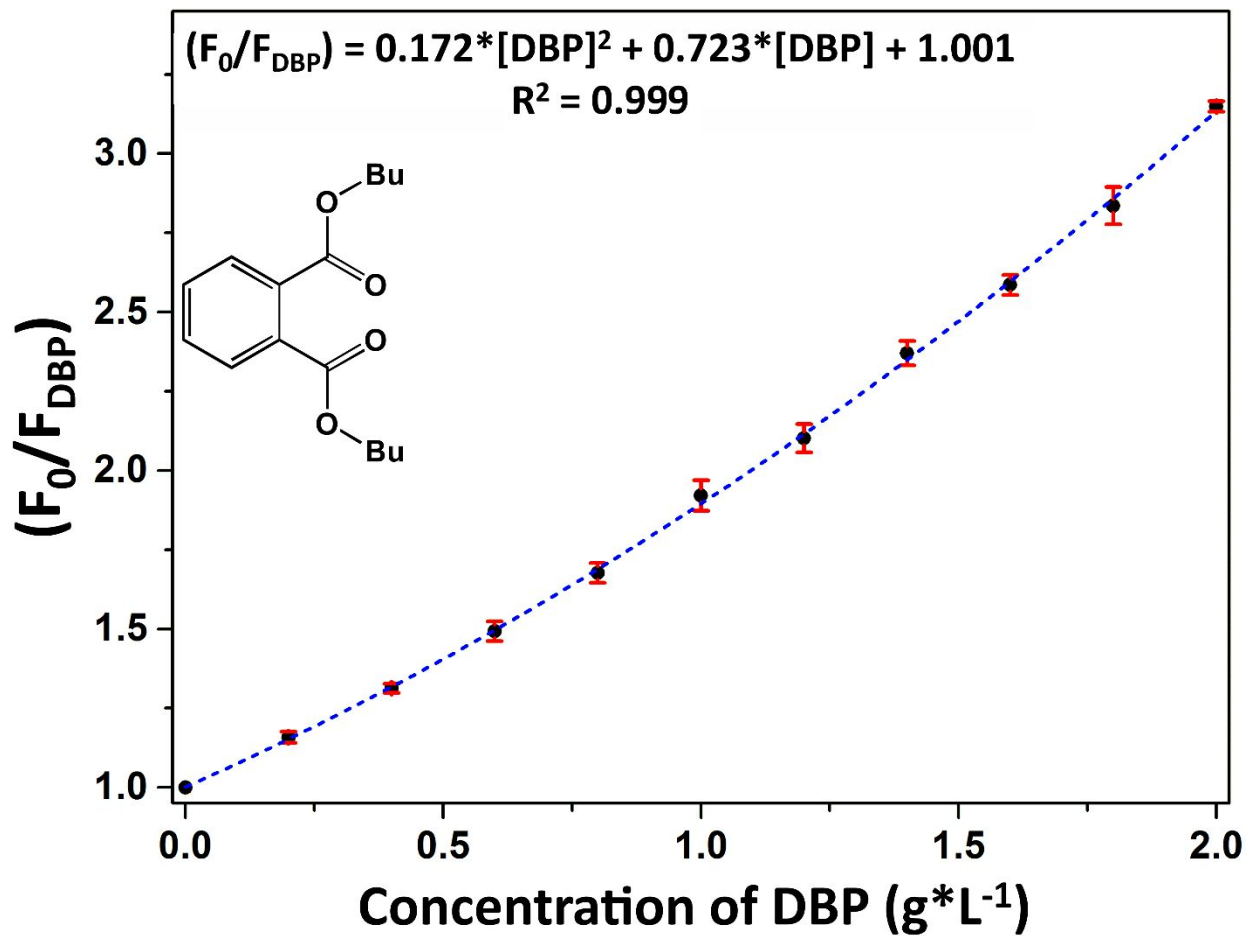

Figure S4\_d. Modified Stern-Volmer fitting for the fluorescence quenching of Z8P-5.00 versus di butyl phthalate (DBP) (from 0.0 to 2.0  $g \cdot L^{-1}$ ). The excitation wavelength is 277 nm, and the emission is recorded at the maximum at 430 nm.

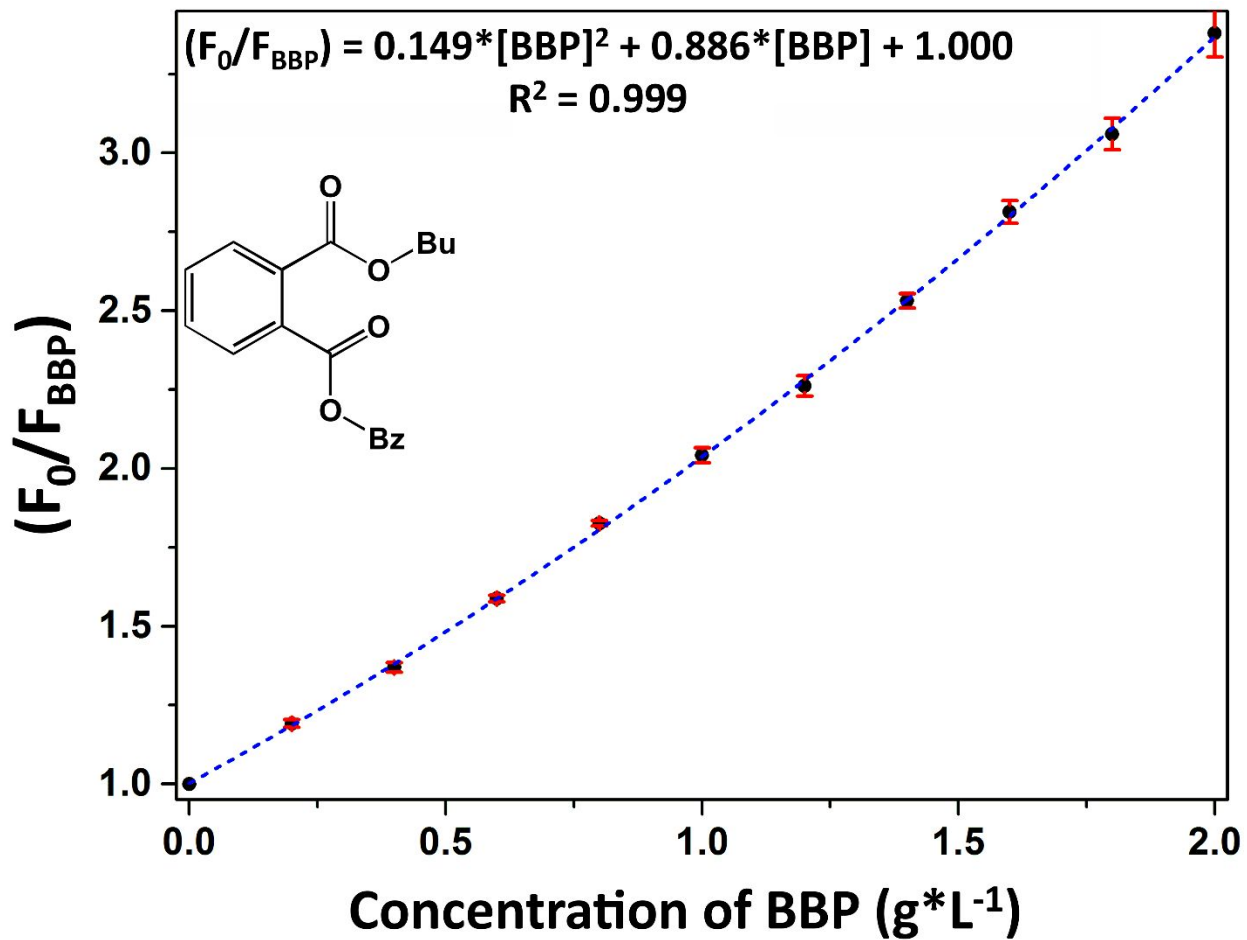

Figure S4\_e. Modified Stern-Volmer fitting for the fluorescence quenching of Z8P-5.00 versus benzyl butyl phthalate (BBP) (from 0.0 to 2.0 g\*L<sup>-1</sup>). The excitation wavelength is 277 nm, and the emission is recorded at the maximum at 430 nm.



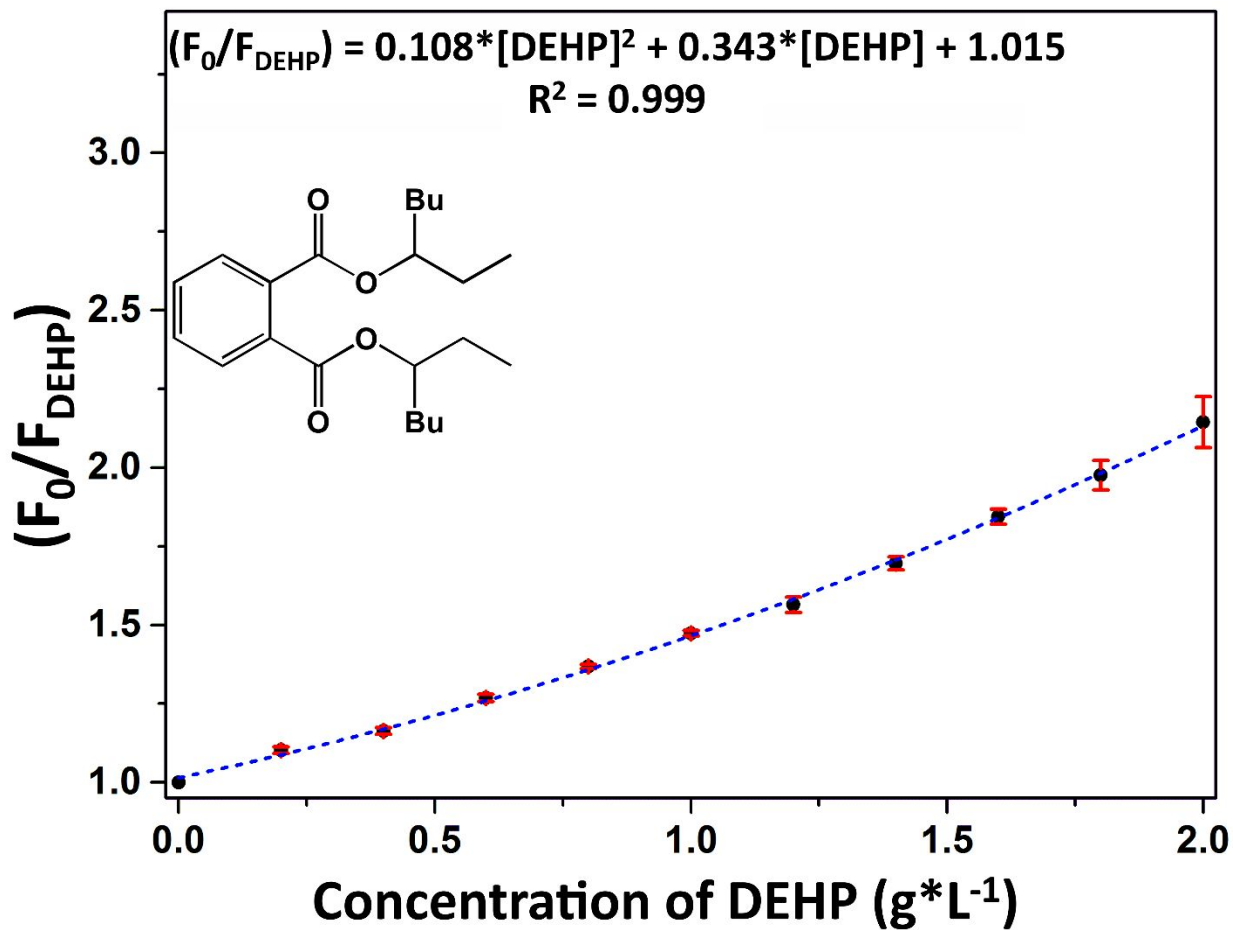

Figure S4\_f. Modified Stern-Volmer fitting for the fluorescence quenching of Z8P-5.00 versus diethyl hexyl phthalate (DEHP) (from 0.0 to 2.0 g\*L<sup>-1</sup>). The excitation wavelength is 277 nm, and the emission is recorded at the maximum at 430 nm.

| Phthalate analyte | LoD in g*L <sup>-1</sup> |
|-------------------|--------------------------|
| DMP               | 0.039                    |
| DBP               | 0.026                    |
| BBP               | 0.013                    |
| DEHP              | 0.029                    |

Figure S4\_g. Calculated Limits of Detection for the different analytes with the presented system.

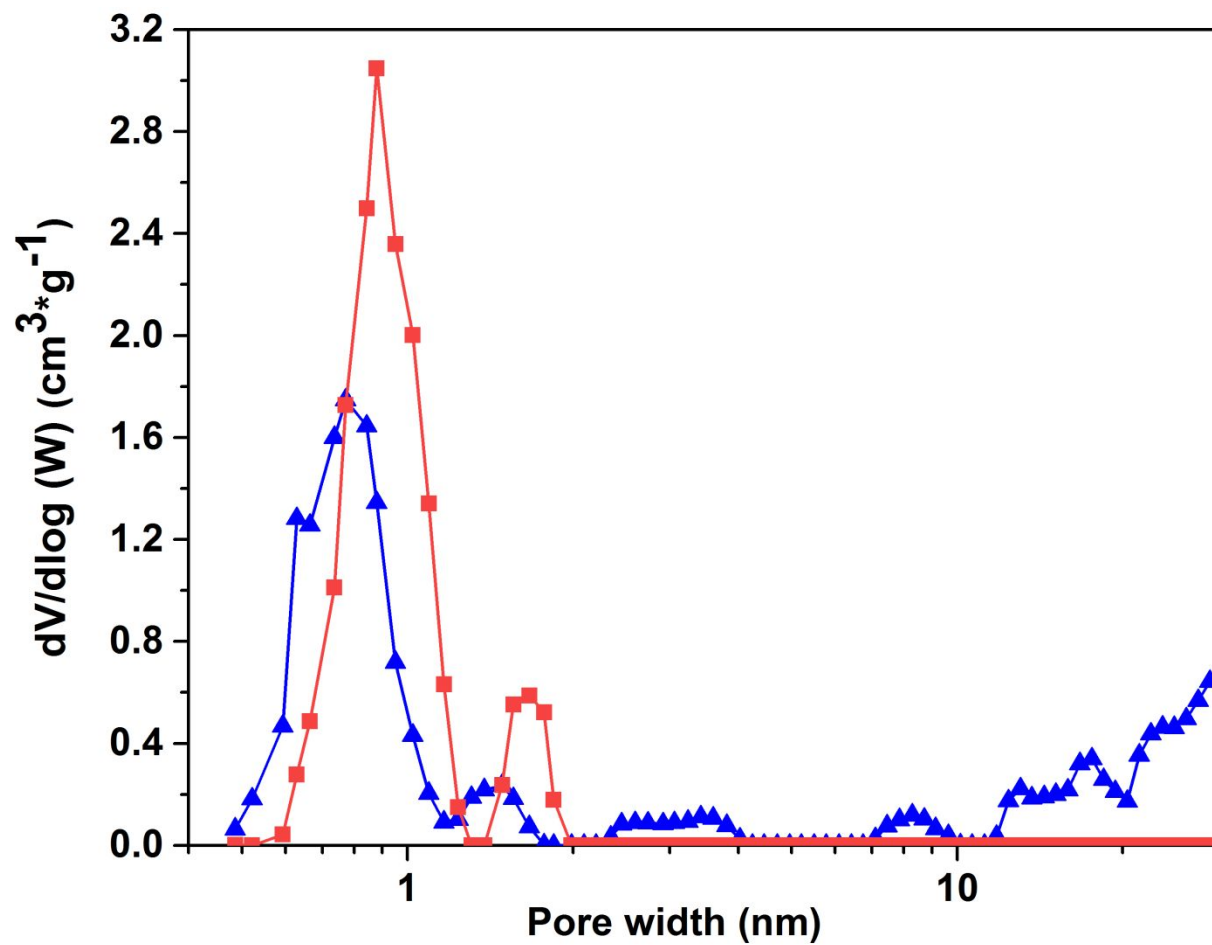

Figure S5\_a. PSD for materials ZIF-8 (red squares) and Z8P-5.00 (blue triangles).

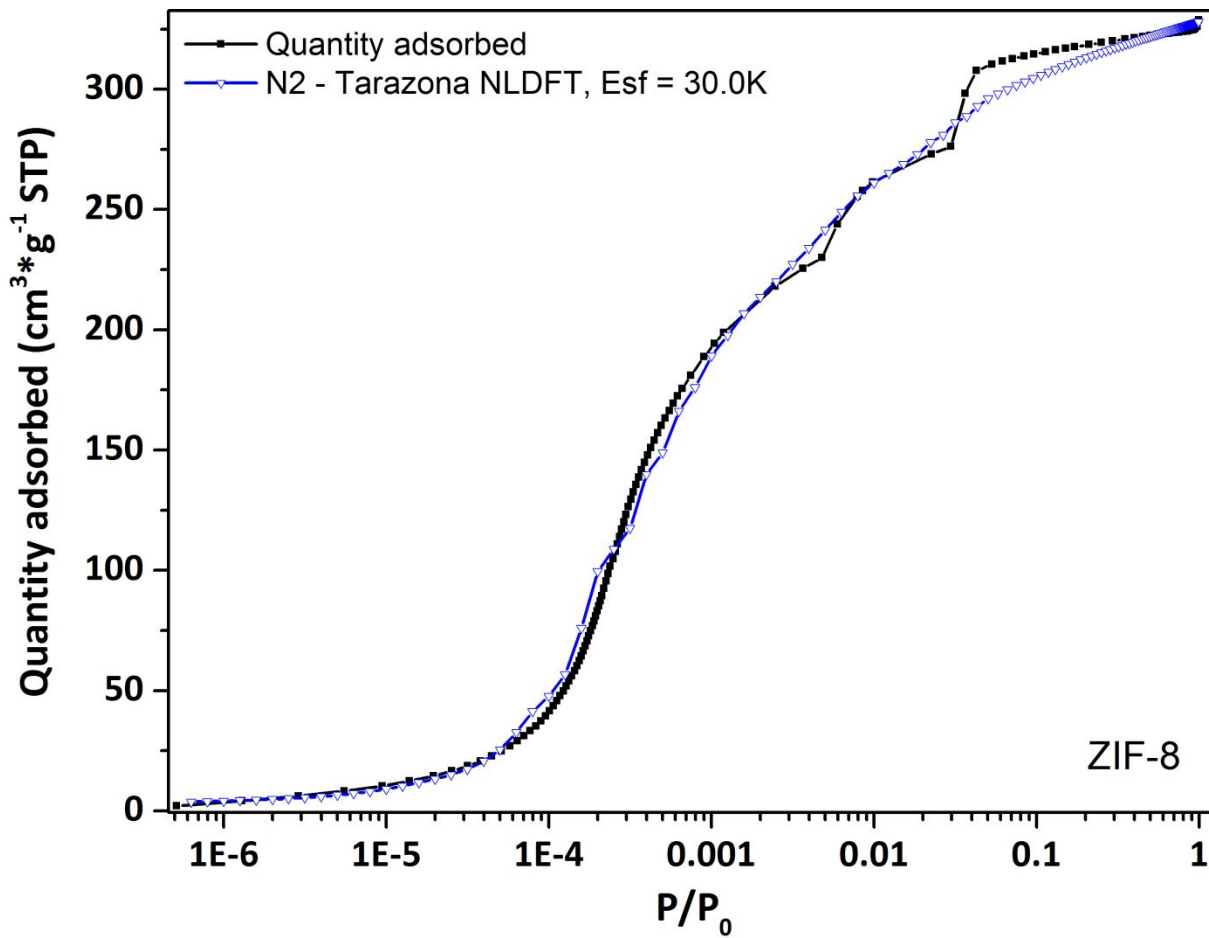

Figure S5\_b. N<sub>2</sub> adsorption data at -196°C for material ZIF-8, and calculated values after fitting to NL-DFT.

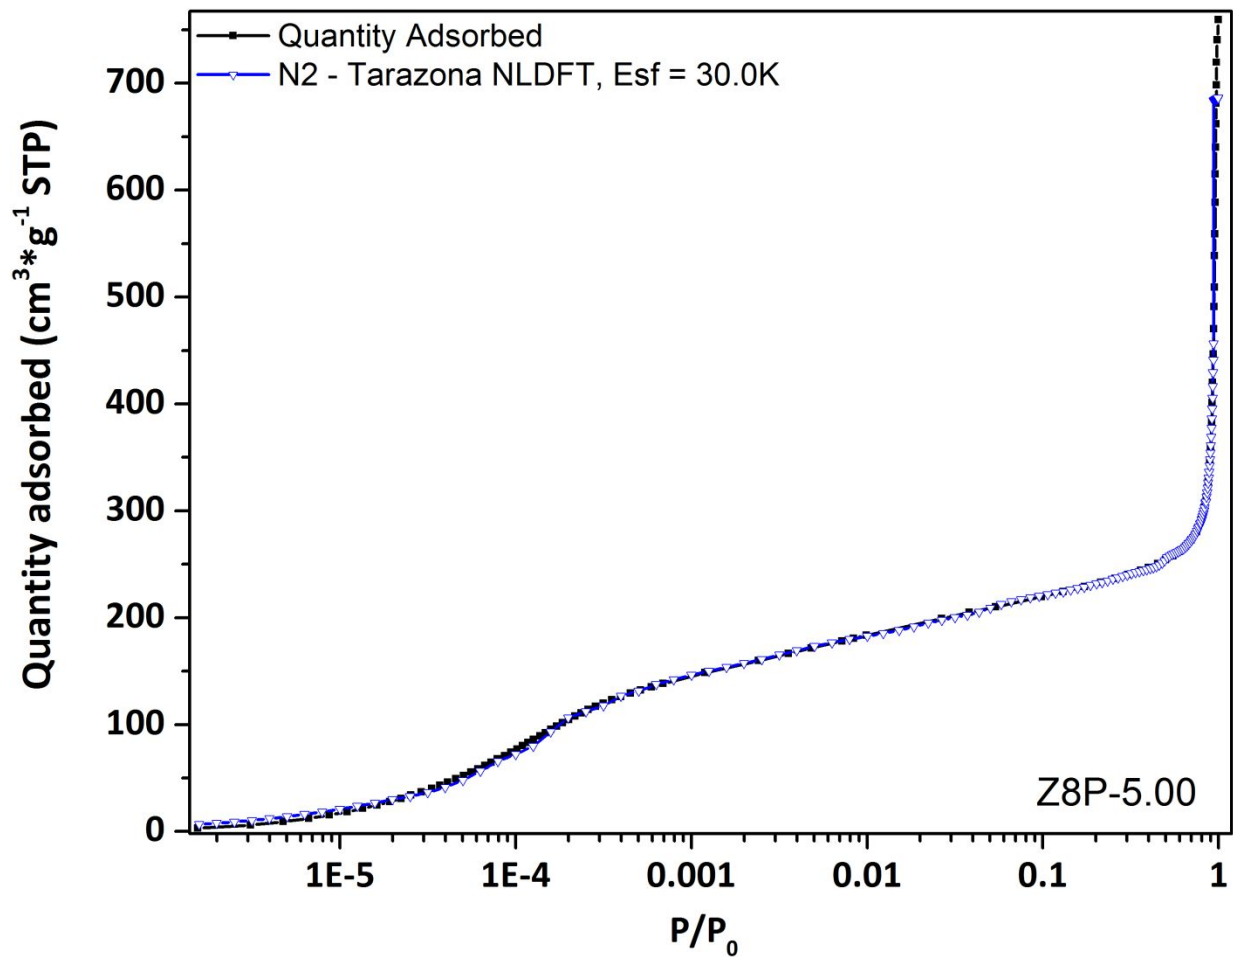

Figure S5\_c. N<sub>2</sub> adsorption data at -196°C for material Z8P-5.00, and calculated values after fitting to NL-DFT.
